# Supplementary material for: Emergency visits post-Mental Health Promotion and Welfare Act 2017: Suicide/self-harm attempts in Korea
Source: Research Square preprint supplement (doi:10.21203/rs.3.rs-6985325/v1), 2025-07-30
Supplement: Supplementary file 1 [file 85d827222e0a582ddea442f4.docx]

**Appendix**

Table A.1: Factors for Suicide/Self-harm Attempts (Females aged 20-39)

|  | 2014 | 2018 | 2020 | Total (2014-2020 inclusive) |
| --- | --- | --- | --- | --- |
|  |  | n (%) |  |
| Family/friend conflict | 115 (31.2) | 220 (28.6) | 262 (24.6) | 1,214 (27.4) |
| Health problem | 3 (0.8) | 13 (1.7) | 11 (1.0) | 46 (1.0) |
| Work/school problem | 14 (3.8) | 35 (4.6) | 49 (4.6) | 190 (4.3) |
| Economic problem | 7 (1.9) | 14 (1.8) | 13 (1.2) | 61 (1.4) |
| Depression | 82 (22.2) | 209 (27.2) | 466 (43.8) | 1,475 (33.3) |
| Other/unknown mental health problem | 24 (6.5) | 121 (15.7) | 174 (16.4) | 596 (13.4) |
| Others | 124 (33.6) | 156 (20.3) | 88 (8.3) | 853 (19.2) |
| **Total Suicide/Self-harm Attempts** | 369 (100.0) | 768 (17.3) | 1,063 (100.0) | 4,435 (100.0) |

*Note:* ‘Others’ include ‘Family/friend death’, ‘Abuse’, and ‘Drug addiction’. The total column includes all years from 2014 to 2020.

Table A.2: Effects of the revised Act on Suicide Attempts (Depression controlled)

Total Suicide Attempts (Depression controlled)

(1) (2) (3) (4) (5) (6) (7)

Conventional 45.61** 42.92** 41.16** 40.51** 40.16** 39.52** 38.56** (22.66) (21.19) (19.98) (18.93) (18.02) (17.21) (16.48)

Bias-corrected 41.57* 40.84* 41.10** 41.40** 41.70** 41.33** 39.88** (22.66) (21.19) (19.98) (18.93) (18.02) (17.21) (16.48)

Robust 41.57 40.84 41.10* 41.40* 41.70* 41.33* 39.88* (27.59) (26.08) (24.85) (23.81) (22.88) (22.10) (21.39)

N 84 84 84 84 84 84 84

h_l (h_r) 10 11 12 13 14 15 16

b_l (b_r) 15 16 17 18 19 20 21

Standard errors in parentheses. * p*<*0.1, ** p*<*0.05, *** p*<*0.01.

*Note:* h_l (h_r) refers to the main bandwidth used on the left (right) of the cutoff, and b_l (b_r) refers to the bias bandwidth used on the left (right) of the cutoff.

Table A 3: Number of Individuals Admitted to Emergency Departments by Admission Type

|  |  | Year | | | | | | |
| --- | --- | --- | --- | --- | --- | --- | --- | --- |
|  |  | 2014 | 2015 | 2016 | 2017 | 2018 | 2019 | 2020 |
| Voluntary admission | | 24,266 | 26,064 | 28,285 | 36,465 | 30,092 | 29,792 | 27,430 |
| Consented admission | | - | - | - | 12,325 | 13,078 | 13,873 | 13,443 |
| Admission by guardian | |  |  |  |  |  |  |  |
|  | Guardian- Family member | 49,792 | 47,235 | 43,643 | 24,234 | 19,049 | 17,298 | 16,912 |
|  | Guardian- City Mayor, County Governor, Municipal Governor | 6,235 | 6,432 | 6,021 | - | - | - | - |
|  | Others | 1,159 | 1,200 | 1,300 | 1,570 | 1,078 | 1,048 | 1,094 |
| Admission by City Mayor, County Governor, Municipal Governor | | 147 | 131 | 94 | 2,514 | 2,746 | 3,318 | 3,798 |
| Emergency admission | | 26 | 43 | 58 | 53 | 65 | 107 | 25 |
| Total | | 81,625 | 81,105 | 79,401 | 77,161 | 66,108 | 65,436 | 62,702 |
